# Supplementary material for: Training Methods Used by Dog Guardians in the United States: Prevalence, Sources of Information, and Reasons for Use
Source: MDPI journal article supplement (doi:10.3390/ani14091310), 2024-04-27
Supplement: s1 [file s1]

## Survey questions presented to student participants

| Human Demographic information |                      |
|-------------------------------|----------------------|
| Q1: Gender                    | Male                 |
|                               | Female               |
|                               | Other                |
|                               | Choose not to answer |
| Q2: Age                       | 18-30                |
|                               | 31-40                |
|                               | 41-50                |
|                               | 51-60                |
|                               | 61-70                |
|                               | 71-80                |
|                               | 80+                  |

Q3: Income Bracket (Please provide the income range for the home where the dog resides).

0-10k  
11-30k  
31-50k  
51-70k  
71-90k  
90-110k  
120-250k  
250k+

---

Q4 Zip Code

---

Q5: How many individuals (including yourself) live in your household?

---

Q6: Other individuals in the household: Select as many options as you need to cover all members of your household.

Partner/Spouse  
Children under 10  
Children 11-18  
Older children  
Other relative  
Other adult

---

Q7: Please choose one word that best describes your relationship to your dog

Parent  
Owner  
Guardian  
Friend  
Master/Mistress  
Family member (e.g. sister, brother, sibling)  
*(Added for Fall 2021 survey)*  
Other

---

Dog Demographic information: Please answer for the dog you spend most time with. If you are not able to distinguish among your dogs, answer questions for the dog whose name comes first in the alphabet.

---

Q8: Dog's Date of Birth (write unknown if date is not known)

---

Q9: Dog's Current Age: Please write in years, allowing for decimal e.g.: .5 year (6 months)

---

|             |                |
|-------------|----------------|
| Q10: Gender | Male, intact   |
|             | Female, intact |
|             | Male, neutered |
|             | Female, spayed |

---

|                                              |                                                                                                |
|----------------------------------------------|------------------------------------------------------------------------------------------------|
| Q11: Where did you first hear about the dog? | Friend/Family Member                                                                           |
|                                              | Internet (Rescue site, Petfinder, Craigslist, internet search)                                 |
|                                              | Printed Media                                                                                  |
|                                              | Visit to physical location (e.g.: breeder, shelter, pet store) without specific animal in mind |
|                                              | Other                                                                                          |

---

|                                            |                                                                  |
|--------------------------------------------|------------------------------------------------------------------|
| Q13: Where did you end up getting the dog? | Breeder                                                          |
|                                            | Pet Store                                                        |
|                                            | Bred at home                                                     |
|                                            | Rescue (municipal shelter, private shelter, foster-based rescue) |
|                                            | Friend/Family member                                             |
|                                            | Internet                                                         |
|                                            | Other                                                            |

---

#### Training Methodology

---

|                                            |                      |
|--------------------------------------------|----------------------|
| Q14: I most regularly walk my dog on a ... | Flat Collar          |
|                                            | Martingale           |
|                                            | Chain Collar         |
|                                            | Prong Collar         |
|                                            | Back-clip Harness    |
|                                            | Front-clip Harness   |
|                                            | Head Halter          |
|                                            | I do not walk my dog |

---

Q15: While inside the house, my dog wears  
(select all that apply)

Collar  
No collar (naked)  
Harness  
Activity monitor  
Citronella Collar  
Electronic Collar (to manage barking or other behavior)  
Electronic Collar (for invisible fence system)

---

Q16: Training Class Experience

My dog and I have attended at least one training class/consult  
I have attended training meetings (Enter the number of class sessions your dog attended)  
I am presently taking my dog to training meetings  
I have utilized a private trainer (Enter the number of sessions your dog attended)  
I am presently utilizing a private trainer  
I trained my dog myself  
My dog has not received any formal training

---

*If participant selected that the dog did not receive any formal training—*

---

Q17: If you noted you did not receive any formal training, please select why

*Participants then directed to Q21*

Because my dog is perfect  
Because my dog was previously trained  
Because classes are too expensive  
Didn't have time  
Other

---

*If participant selected that attended any training ---*

---

Q18: How old was your dog when you first attended training class (class or with private trainer)

Please write in years, allowing for decimal  
e.g.: .5 year (6 months)

---

Q19: How old was your dog when you last attended training class (class or with private trainer)

Please write in years, allowing for decimal  
e.g.: .5 year (6 months)

---

Q20: If you sought training with a trainer, how would you describe their methods.

Use of rewards, treats, petting, praise, clickers, no corrections

Use of corrections only (e.g.: electronic collar, spray bottle, tapping with item, alpha roll etc.)

Mixed use of rewards and corrections

---

Q22: When I have concerns about my dog's behavior, I will ask for help from...

My veterinarian

A friend or family member

Research and try techniques from online (websites, YouTube)

Research and try techniques that I have seen on social media (e.g.: Facebook, Instagram, TikTok) (*Option added for Fall 2021*)

Directly ask a dog trainer

The breeder or shelter/rescue where I got my dog from

---

Q23: I have learned how to deal with my dog's behavior from:

Please select the book that you reference the most

Monks of New Skete: e.g.: The Art of Raising a Puppy

Cesar Millan: e.g.: How to raise the Perfect Dog

Sophia Yin: e.g.: How to behave so your dog behaves

Zac George: e.g.: Dog Training Revolution

Brandon McMillan: e.g.: Lucky Dog Lessons

Other

None

---

Q24: I have learned how to deal with my dog's behavior from:

Please select the television show that you reference the most

The Dog Whisperer (Cesar Millan)  
It's Me or the Dog (Victoria Stillwell)  
Dog Impossible (Matt Beisner)  
Canine Intervention (Jas Leverette)  
Lucky Dog (Brandon McMillian)  
Other  
None

Q25: I have learned how to deal with my dog's behavior from:

Please select the method of social media that you reference the most

*(Option added for Fall 2021)*

Facebook  
Instagram  
TikTok  
Twitter

*If selected any social media option:*

Please list some people or groups that you follow for behavior advice

---

### Managing Behavior

---

Q26: Pulls on Leash

Auditory Correction (person makes loud noise, use of physical item to make noise (Pet corrector, shake can etc.)  
Physical Correction (pinch, push, etc.)  
Reward alternative behavior  
Management of dog's access to whatever might be bothering dog  
Use of electronic collar (human or bark activated)  
Specialized Leash equipment (prong collar, harness, choke chain)  
Ignore  
Time Outs  
This is not a problem my dog has

---

Q27: Barking in the home (e.g.: when alone, at activity outside of the house, demand barking)

Auditory Correction (person makes loud noise, use of physical item to make noise (Pet corrector, shake can etc.)

Physical Correction (pinch, push, etc.)

Reward alternative behavior

Management of dog's access to whatever might be bothering dog

Use of electronic collar (human or bark activated)

Ignore

Time Outs

This is not a problem my dog has

---

Q28: Aggression to dog (e.g.: barking, lunging, growling, biting)

Auditory Correction (person makes loud noise, use of physical item to make noise (Pet corrector, shake can etc.)

Physical Correction (pinch, push, etc.)

Reward alternative behavior

Management of dog's access to whatever might be bothering dog

Use of electronic collar (human or bark activated)

Ignore

Time Outs

This is not a problem my dog has

---

Q29: Aggressive to people (e.g.: bark, lunge, growl, bite)

Auditory Correction (person makes loud noise, use of physical item to make noise (Pet corrector, shake can etc.)

Physical Correction (pinch, push, etc.)

Reward alternative behavior

Management of dog's access to whatever might be bothering dog

Use of electronic collar (human or bark activated)

Ignore

Time Outs

This is not a problem my dog has

---



Q30: Destructive Behavior (e.g.: destroys inappropriate items like clothing, furniture etc.)

Auditory Correction (person makes loud noise, use of physical item to make noise (Pet corrector, shake can etc.)

Physical Correction (pinch, push, etc.)

Reward alternative behavior

Management of dog's access to whatever might be bothering dog

Use of electronic collar (human or bark activated)

Ignore

Time Outs

This is not a problem my dog has

---

Q31: Jumping up on people

Auditory Correction (person makes loud noise, use of physical item to make noise (Pet corrector, shake can etc.)

Physical Correction (pinch, push, etc.)

Reward alternative behavior

Management of dog's access to whatever might be bothering dog

Use of electronic collar (human or bark activated)

Ignore

Time Outs

This is not a problem my dog has

---

Q32: Resource Guarding (e.g.: barking, lunging, growling when dog is either by food or items)

Auditory Correction (person makes loud noise, use of physical item to make noise (Pet corrector, shake can etc.)

Physical Correction (pinch, push, etc.)

Reward alternative behavior

Management of dog's access to whatever might be bothering dog

Use of electronic collar (human or bark activated)

Ignore

Time Outs

This is not a problem my dog has

---

Q33: Does not respond when called (e.g.: will not come back when off leash either in home or outside)

Auditory Correction (person makes loud noise, use of physical item to make noise (Pet corrector, shake can etc.)

Physical Correction (pinch, push, etc.)

Reward alternative behavior

Management of dog's access to whatever might be bothering dog

Use of electronic collar (human or bark activated)

Ignore

Time Outs

This is not a problem my dog has

---

*If participant selected any management strategy for any of the problem behaviors*

---

|                                                                              |                                                                                                              |
|------------------------------------------------------------------------------|--------------------------------------------------------------------------------------------------------------|
| Q34-Q41: Please select what led you to utilize this method for leash pulling | Recommendation from a trainer                                                                                |
|                                                                              | Recommendation from a friend/family member                                                                   |
|                                                                              | Recommendation from a vet                                                                                    |
|                                                                              | Saw this method online (websites, YouTube)                                                                   |
|                                                                              | Saw this method on social media (Facebook, Instagram, TikTok, Twitter) ( <i>Option added for Fall 2021</i> ) |
|                                                                              | Saw this method in a book                                                                                    |
|                                                                              | Saw this method on a TV show                                                                                 |
|                                                                              | Other                                                                                                        |

---

*Participant reported efficacy*

---

|                                                                                                                        |                                                                                                     |
|------------------------------------------------------------------------------------------------------------------------|-----------------------------------------------------------------------------------------------------|
| Q42: Of all the training techniques you have used with your dog, what technique do you think has been LEAST effective? | Use of rewards, treats, petting, praise, clickers, no corrections                                   |
|                                                                                                                        | Use of corrections only (e.g.: electronic collar, spray bottle, tapping with item, alpha roll etc.) |
|                                                                                                                        | Mixed use of rewards and corrections                                                                |
| Q43: Of all the training techniques you have used with your dog, what technique do you think has been MOST effective?  | Use of rewards, treats, petting, praise, clickers, no corrections                                   |
|                                                                                                                        | Use of corrections only (e.g.: electronic collar, spray bottle, tapping with item, alpha roll etc.) |
|                                                                                                                        | Mixed use of rewards and corrections                                                                |
| Q44: Why do you think this technique was effective? Please select no more than two options                             | Dog does not show the behavior anymore                                                              |
|                                                                                                                        | Ease of Use                                                                                         |
|                                                                                                                        | Better ability to control the dog                                                                   |
|                                                                                                                        | Tolerance by the dog                                                                                |
|                                                                                                                        | Inexpensive                                                                                         |
|                                                                                                                        | Worked well with my dog's learning style/motivation                                                 |

---
